# Supplementary material for: Analysing binding stoichiometries in NMR titration experiments using Monte Carlo simulation and resampling techniques
Source: PeerJ journal article supplement (doi:10.7717/peerj-achem.23), 2022-11-28
Supplement: abbreviation.pdf [file abbreviation.pdf]

# Appendix

## Abbreviation and symbols

|                        |                                                                                        |
|------------------------|----------------------------------------------------------------------------------------|
| $[A]$                  | concentration of component A                                                           |
| $[A]_0$                | initial concentration of component A                                                   |
| $[B]$                  | concentration of component B                                                           |
| $[B]_0$                | initial concentration of component B                                                   |
| $[X]$                  | concentration of any component                                                         |
| $K_{11}$               | step-wise stability constant for a 1:1 complex                                         |
| $K_{21}$               | step-wise stability constant for a 2:1 complex                                         |
| $K_{12}$               | step-wise stability constant for a 1:2 complex                                         |
| $\lg K$                | $\log_{10}$ of stability constant K                                                    |
| $a, b$                 | equivalent of component A or B                                                         |
| $r_i$                  | stoichiometric ratio                                                                   |
| $n_i$                  | nuclearity                                                                             |
| $x$                    | independent data, random number                                                        |
| $y$                    | observed signal or physical property, dependent data                                   |
| $\theta$               | parameter in general                                                                   |
| $\hat{\theta}$         | estimated parameter / best-fit parameter                                               |
| $[\theta_-, \theta_+]$ | confidence interval, range within $\hat{\theta}$ is expected to be                     |
| $SSE$                  | sum of squared errors                                                                  |
| $SE_y$                 | standard error                                                                         |
| MC                     | Monte Carlo simulation                                                                 |
| BS                     | Bootstrapping                                                                          |
| CV                     | Cross Validation                                                                       |
| L1O                    | Leave-One-Out                                                                          |
| L2O                    | Leave-Two-Out                                                                          |
| LXO                    | Leave-X-Out                                                                            |
| X                      | Number of data points to leave out during CV                                           |
| RA                     | Reduction Analysis                                                                     |
| S                      | number of MC or CV steps                                                               |
| $S_{max}$              | maximal number of CV steps                                                             |
| N                      | number of data points                                                                  |
| $\sigma$               | standard deviation of normal distribution                                              |
| $\sigma_{MC}$          | standard deviation used to set up Monte Carlo simulations                              |
| $\sigma_{dist}$        | $\sigma$ of a distribution after Monte Carlo simulation or Cross Validation            |
| $H(x)$                 | Shannon entropy of a distribution of random numbers (eg. after Monte Carlo simulation) |
| $\sigma_{pt}$          | Partial standard deviation calculated from the results of a RA                         |
